# Supplementary material
Source: MDPI journal article supplement (https://www.mdpi.com/1999-4907/13/7/1083)
Supplement: s1 [file s1 › forests-1696945-supplementary.pdf]

**Table S1** The biomass of shrubs, herbs and litter in different vegetation types

| Vegetation types               | Shrub aboveground<br>biomass (g m <sup>-2</sup> ) | Shrub belowground<br>biomass (g m <sup>-2</sup> ) | Herb aboveground<br>biomass (g m <sup>-2</sup> ) | Herb belowground<br>biomass (g m <sup>-2</sup> ) | Litter biomass<br>(g m <sup>-2</sup> ) |
|--------------------------------|---------------------------------------------------|---------------------------------------------------|--------------------------------------------------|--------------------------------------------------|----------------------------------------|
| <i>R. pseudoacacia</i> forest  | 35.43±10.25                                       | 20.89±9.18                                        | 102.34±59.89                                     | 38.74±14.87                                      | 753.43±197.29                          |
| <i>P. tabulaeformis</i> forest | 99.26±35.46                                       | 45.38±12.11                                       | 25.78±11.30                                      | 20.25±8.05                                       | 1637.19±478.87                         |
| Shrubland                      | 492.63±46.46                                      | 210.97±21.28                                      | 61.14±9.36                                       | 49.81±5.79                                       | 24.26±3.07                             |
| Abandoned farmland             | 65.20±5.67                                        | 39.78±4.87                                        | 74.90±6.34                                       | 55.90±8.70                                       | 19.62±2.14                             |

Note: Data are expressed as mean±SE.

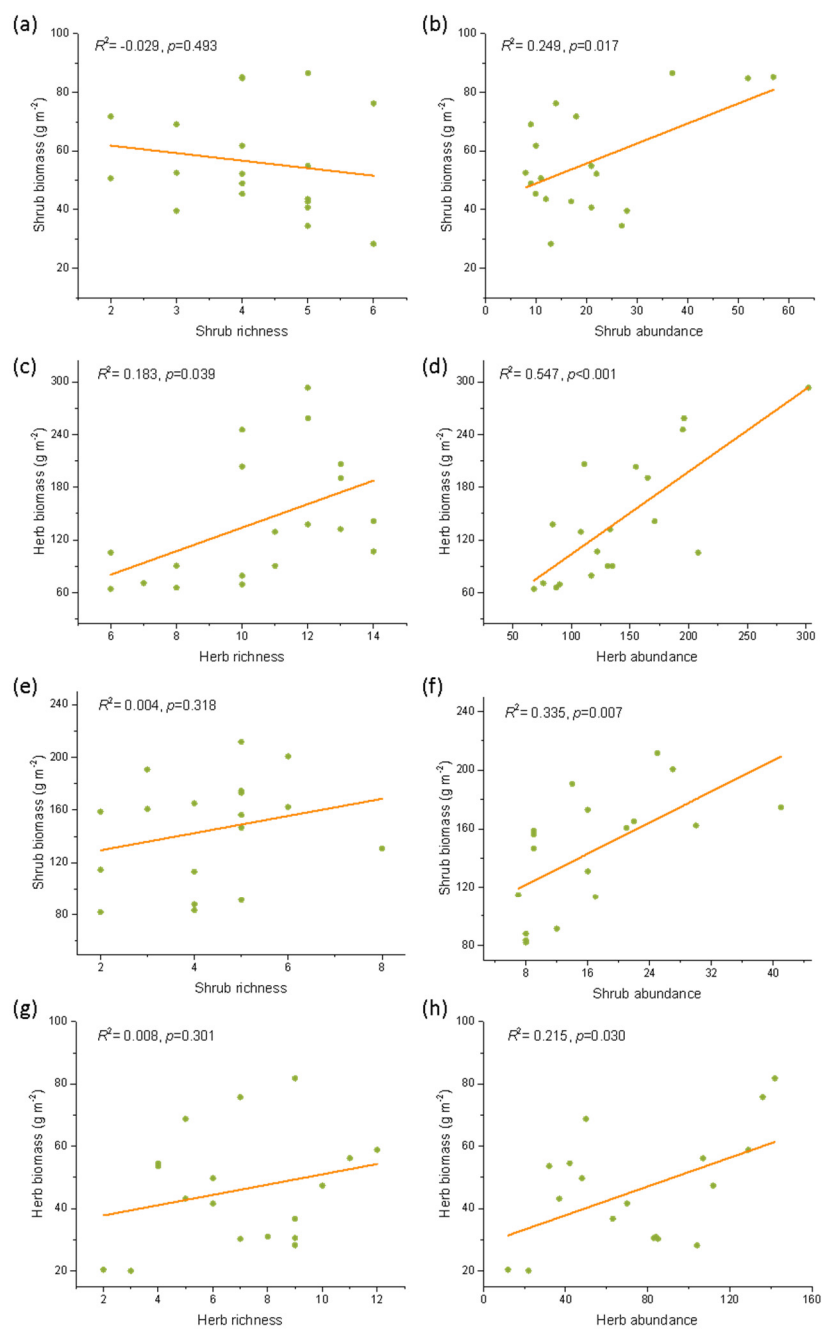

**Figure S1.** Relationship between richness, abundance and biomass of shrubs and herbs in *R. pseudoacacia* forests (a, b, c, d) and *P. tabulaeformis* forests (e, f, g, h).

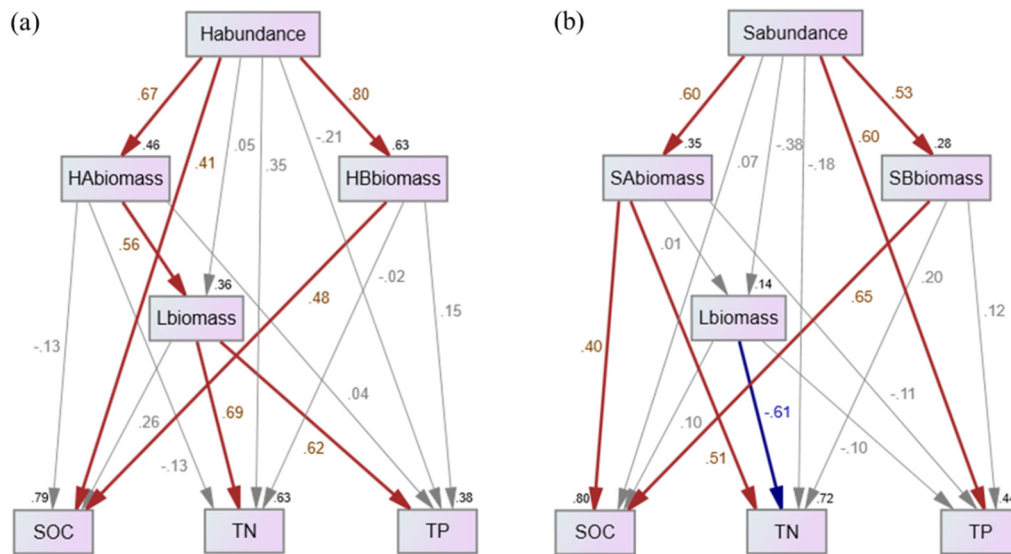

**Figure S2.** Direct and indirect effects of understory plant abundance on SOC, TN and TP. Herb and shrub abundance are the most significant vegetation factors affecting soil nutrients in the *R. pseudoacacia* (a,  $\chi^2 = 6.202$ , DF = 5, CMIN/DF = 1.240, GFI = 0.917, CFI = 0.984, RMSEA = 0.116) and *P. tabuliformis* forest (b,  $\chi^2 = 5.375$ , DF = 5, CMIN/DF = 1.075, GFI = 0.924, CFI = 0.994, RMSEA = 0.066), respectively. Brown and navy arrows indicate significant positive and negative correlations ( $p < 0.05$ ), respectively. The number above the box represents the multiple R<sup>2</sup>. Habundance, herb abundance; HABiomass, herb aboveground biomass; HBbiomass, herb belowground biomass; Sabundance, shrub abundance; SABiomass, shrub aboveground biomass; SBbiomass, shrub belowground biomass; Lbiomass, litter biomass.
